# Supplementary figures and images for: Conformational structures of the tetrahydrofuran cation determined using one-photon mass-analyzed threshold ionization spectroscopy
Source: Royal Society of Chemistry journal article supplement (doi:10.1039/c7cp05646j), 2017-01-01

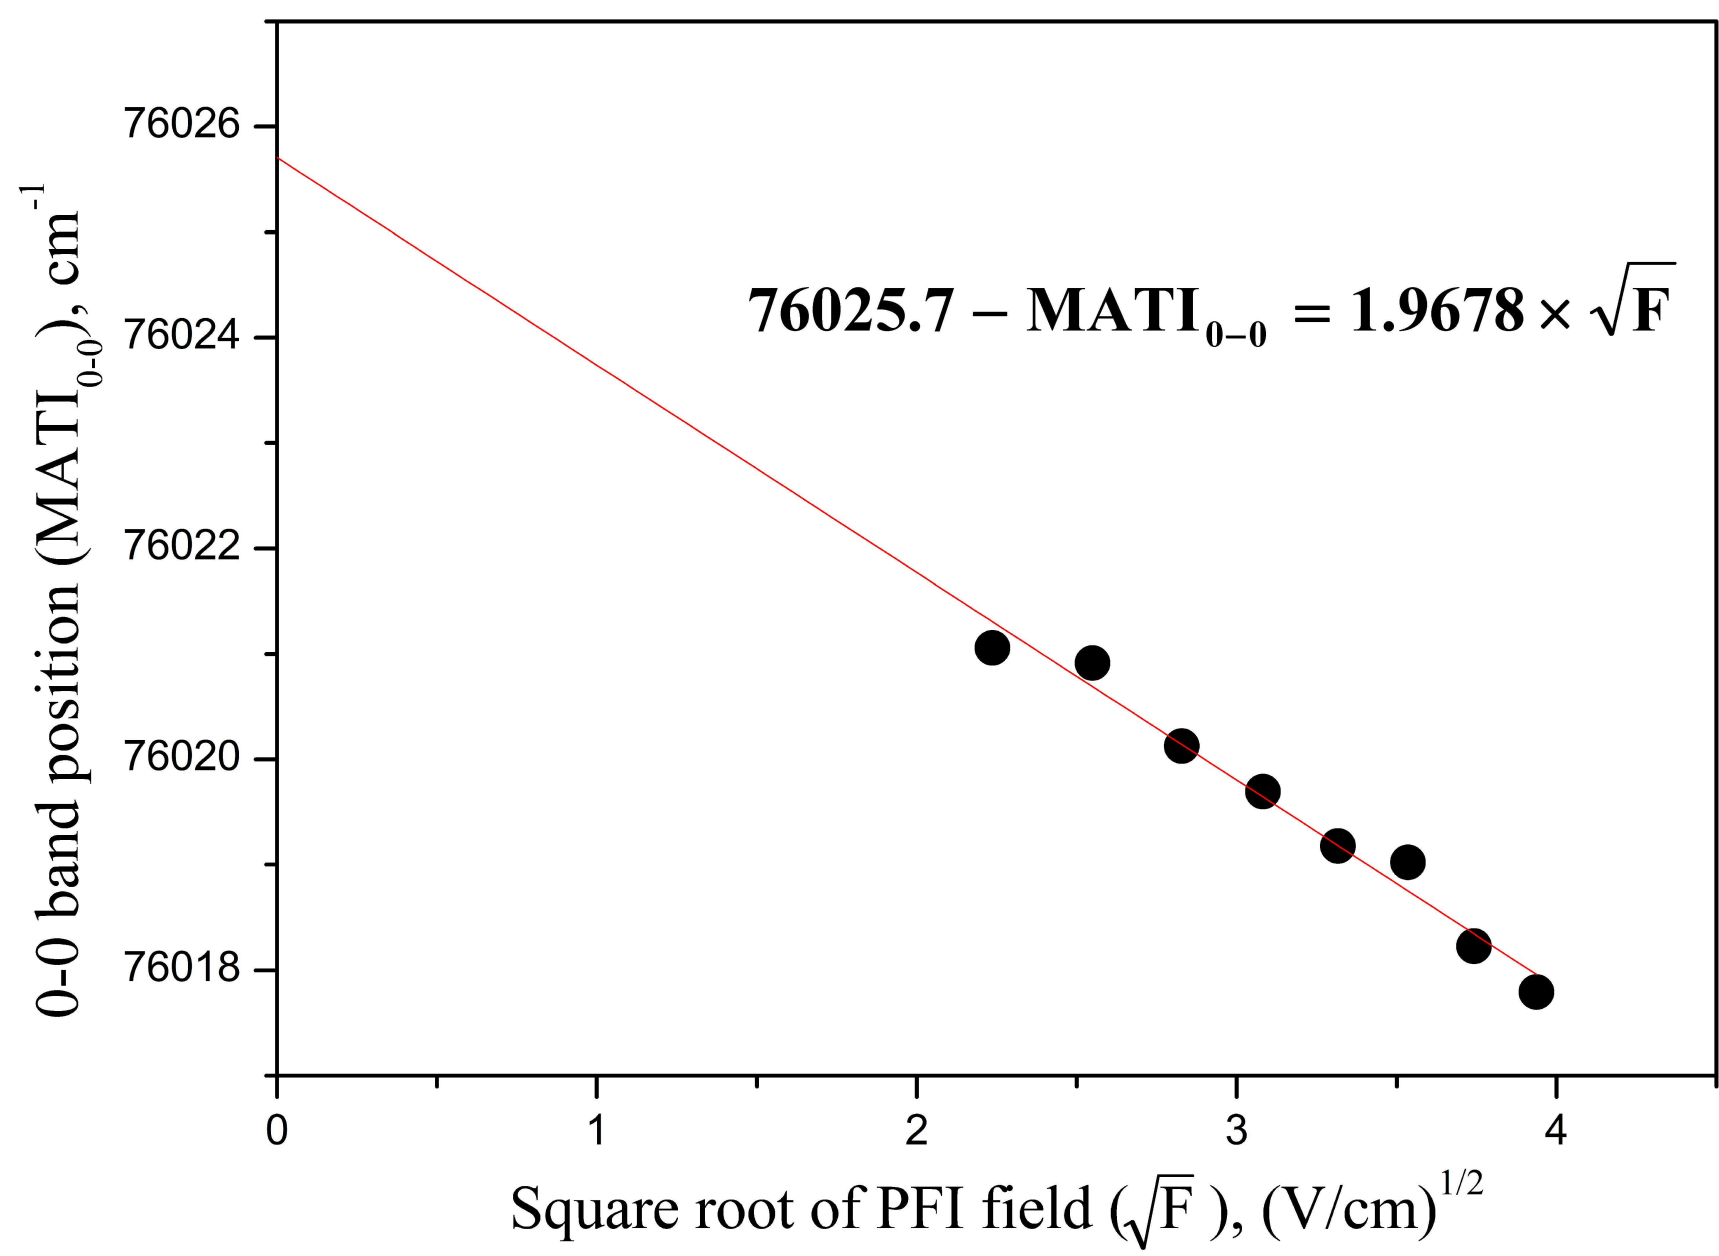

Supplement: c7cp05646j1.pdf [file c7cp05646j1.pdf]
